# Supplementary material for: The Sound of Memory: Investigating Music Therapy’s Cognitive Benefits in Patients with Dementia—A Network Meta-Analysis of Randomized Controlled Trials
Source: MDPI journal article supplement (doi:10.3390/jpm14050497), 2024-05-08
Supplement: s1 [file s1]

**Table S1 - PRISMA for network meta-analysis checklist**

| Section and Topic       | # | Checklist item                                                                                                                                                                                                                                                                                                                                                                                                                                                                                                                                                                                                                                                                                                                 | Location                                          |
|-------------------------|---|--------------------------------------------------------------------------------------------------------------------------------------------------------------------------------------------------------------------------------------------------------------------------------------------------------------------------------------------------------------------------------------------------------------------------------------------------------------------------------------------------------------------------------------------------------------------------------------------------------------------------------------------------------------------------------------------------------------------------------|---------------------------------------------------|
| <b>Title</b>            |   |                                                                                                                                                                                                                                                                                                                                                                                                                                                                                                                                                                                                                                                                                                                                |                                                   |
| Title                   | 1 | Identify the report as a systematic review incorporating a network meta-analysis (or related form of meta-analysis).                                                                                                                                                                                                                                                                                                                                                                                                                                                                                                                                                                                                           | Title                                             |
| <b>Abstract</b>         |   |                                                                                                                                                                                                                                                                                                                                                                                                                                                                                                                                                                                                                                                                                                                                |                                                   |
| Structured summary      | 2 | Provide a structured summary including, as applicable: Background: main objectives / Methods: data sources; study eligibility criteria, participants, and interventions; study appraisal; and synthesis methods, such as network meta-analysis. / Results: number of studies and participants identified; summary estimates with corresponding confidence/credible intervals; treatment rankings may also be discussed. Authors may choose to summarize pairwise comparisons against a chosen treatment included in their analyses for brevity. / Discussion/conclusions: limitations; conclusions and implications of findings. / Other: primary source of funding; systematic review registration number with registry name. | Abstract                                          |
| <b>Introduction</b>     |   |                                                                                                                                                                                                                                                                                                                                                                                                                                                                                                                                                                                                                                                                                                                                |                                                   |
| Rationale               | 3 | Describe the rationale for the review in the context of what is already known, including mention of why a network meta-analysis has been conducted.                                                                                                                                                                                                                                                                                                                                                                                                                                                                                                                                                                            | Introduction / 1st and 2nd paragraph              |
| Objectives              | 4 | Provide an explicit statement of questions being addressed, with reference to participants, interventions, comparisons, outcomes, and study design (PICOS).                                                                                                                                                                                                                                                                                                                                                                                                                                                                                                                                                                    | Introduction / 3rd paragraph                      |
| <b>Methods</b>          |   |                                                                                                                                                                                                                                                                                                                                                                                                                                                                                                                                                                                                                                                                                                                                |                                                   |
| Protocol & registration | 5 | Indicate whether a review protocol exists and where it can be accessed; and, if available, provide registration information, including registration number.                                                                                                                                                                                                                                                                                                                                                                                                                                                                                                                                                                    | Materials and Methods/ 1st paragraph              |
| Eligibility criteria    | 6 | Specify study characteristics (e.g., PICOS, length of follow-up) and report characteristics (e.g., years considered, language, publication status) used as criteria for eligibility, giving                                                                                                                                                                                                                                                                                                                                                                                                                                                                                                                                    | Materials and Methods/<br>Inclusion and exclusion |

|                             |    |                                                                                                                                                                                                                                                                                                              |                                                                                 |
|-----------------------------|----|--------------------------------------------------------------------------------------------------------------------------------------------------------------------------------------------------------------------------------------------------------------------------------------------------------------|---------------------------------------------------------------------------------|
|                             |    | rationale. Clearly describe eligible treatments included in the treatment network, and note whether any have been clustered or merged into the same node (with justification).                                                                                                                               |                                                                                 |
| Information sources         | 7  | Describe all information sources (e.g., databases with dates of coverage, contact with study authors) in the search and date last searched.                                                                                                                                                                  | Table S2                                                                        |
| Search                      | 8  | Present full electronic search strategy for at least one database, including any limits used, such that it could be repeated.                                                                                                                                                                                | Table S2                                                                        |
| Study selection             | 9  | State the process for selecting studies (i.e., screening, eligibility, included in systematic review, and, if applicable, included in the meta-analysis).                                                                                                                                                    | Materials and Methods / Study Identification / Inclusion and exclusion criteria |
| Data collection             | 10 | Describe method of data extraction from reports (e.g., piloted forms, independently, in duplicate) and any processes for obtaining and confirming data.                                                                                                                                                      | Materials and Methods / Data extraction                                         |
| Data items                  | 11 | List and define all variables for which data were sought (e.g., PICOS, funding sources) and any assumptions and simplifications made.                                                                                                                                                                        | Materials and Methods / Data extraction and conversion                          |
| Network geometry            | S1 | Describe methods used to explore the geometry of the treatment network under study and potential biases related to it. This should include how the evidence base has been graphically summarized for presentation, and what characteristics were compiled and used to describe the evidence base to readers. | Materials and Methods / Modeling for network meta-analysis                      |
| Risk of bias within         | 12 | Describe methods used for assessing risk of bias of individual studies (including specification of whether this was done at the study or outcome level), and how this information is to be used in any data synthesis.                                                                                       | Materials and Methods / Quality appraisal                                       |
| Summary measures            | 13 | State the principal summary measures (e.g., risk ratio, difference in means). Also describe the use of additional summary measures assessed, such as treatment rankings, as well as modified approaches used to present summary findings from meta-analyses.                                                 | Materials and Methods / Outcome                                                 |
| Planned methods of analysis | 14 | Describe the methods of handling data and combining results of studies for each network meta-analysis. This should include, but not be limited to: Handling of multi-arm trials;                                                                                                                             | Materials and Methods / Statistical analyses                                    |

|                             |    |                                                                                                                                                                                                                                                                                                                                                |                                                                |
|-----------------------------|----|------------------------------------------------------------------------------------------------------------------------------------------------------------------------------------------------------------------------------------------------------------------------------------------------------------------------------------------------|----------------------------------------------------------------|
|                             |    | Selection of variance structure; Selection of prior distributions in Bayesian analyses; and Assessment of model fit.                                                                                                                                                                                                                           |                                                                |
| Assessment of inconsistency | S2 | Describe the statistical methods used to evaluate the agreement of direct and indirect evidence in the treatment network(s) studied. Describe efforts taken to address its presence when found.                                                                                                                                                | Materials and Methods / Statistical analyses                   |
| Risk of bias across         | 15 | Specify any assessment of risk of bias that may affect the cumulative evidence.                                                                                                                                                                                                                                                                | Materials and Methods / Publication bias                       |
| Additional analyses         | 16 | Describe methods of additional analyses if done, indicating which were pre-specified. This may include, but not be limited to, the following: Sensitivity or subgroup analyses; Meta-regression analyses; Alternative formulations of the treatment network; and Use of alternative prior distributions for Bayesian analyses (if applicable). | Materials and Methods / Sensitivity analyses                   |
| <b>Results</b>              |    |                                                                                                                                                                                                                                                                                                                                                |                                                                |
| Study selection             | 17 | Give numbers of studies screened, assessed for eligibility, and included in the review, with reasons for exclusions at each stage, ideally with a flow diagram.                                                                                                                                                                                | Results / Study identification<br>Figure 1, Table S2, Table S3 |
| Network structure           | S3 | Provide a network graph of the included studies to enable visualization of the geometry of the treatment network.                                                                                                                                                                                                                              | Figure 2                                                       |
| Network geometry            | S4 | Provide a brief overview of characteristics of the treatment network. This may include commentary on the abundance of trials and randomized patients for the different interventions and pairwise comparisons in the network, gaps of evidence in the treatment network, and potential biases reflected by the network structure.              | Results / Network model formation / Figure 2                   |
| Study characteristics       | 18 | For each study, present characteristics for which data were extracted (e.g., study size, PICOS, follow-up period) and provide the citations.                                                                                                                                                                                                   | Table 1                                                        |
| Risk of bias within         | 19 | Present data on risk of bias of each study and, if available, any outcome level assessment.                                                                                                                                                                                                                                                    | Table S4, Figure S1, Methodological quality                    |

|                               |    |                                                                                                                                                                                                                                                                                                                                                                                                                                                       |                                                              |
|-------------------------------|----|-------------------------------------------------------------------------------------------------------------------------------------------------------------------------------------------------------------------------------------------------------------------------------------------------------------------------------------------------------------------------------------------------------------------------------------------------------|--------------------------------------------------------------|
| Results of individual studies | 20 | For all outcomes considered (benefits or harms), present, for each study: (1) simple summary data for each intervention group, and (2) effect estimates and confidence intervals. Modified approaches may be needed to deal with information from larger networks.                                                                                                                                                                                    | Table 1                                                      |
| Synthesis of results          | 21 | Present results of each meta-analysis done, including confidence/credible intervals. In larger networks, authors may focus on comparisons versus a particular comparator (e.g. placebo or standard care), with full findings presented in an appendix. League tables and forest plots may be considered to summarize pairwise comparisons. If additional summary measures were explored (such as treatment rankings), these should also be presented. | Outcomes / Figure 3, Figure 4, Figure S2, Figure S3, Table 2 |
| Exploration for inconsistency | S5 | Describe results from investigations of inconsistency. This may include such information as measures of model fit to compare consistency and inconsistency models, P values from statistical tests, or summary of inconsistency estimates from different parts of the treatment network.                                                                                                                                                              | Inconsistency test<br>Table S5, Table S6                     |
| Risk of bias across           | 22 | Present results of any assessment of risk of bias across studies for the evidence base being studied.                                                                                                                                                                                                                                                                                                                                                 | Publication bias, Figure S6                                  |
| Additional analyses           | 23 | Give results of additional analyses, if done (e.g., sensitivity or subgroup analyses, meta-regression analyses, alternative network geometries studied, alternative choice of prior distributions for Bayesian analyses, and so forth).                                                                                                                                                                                                               | Sensitivity analysis / Figure S4, Figure S5                  |
| <b>Discussion</b>             |    |                                                                                                                                                                                                                                                                                                                                                                                                                                                       |                                                              |
| Summary of evidence           | 24 | Summarize the main findings, including the strength of evidence for each main outcome; consider their relevance to key groups.                                                                                                                                                                                                                                                                                                                        | Discussion<br>Findings and implications                      |
| Limitations                   | 25 | Discuss limitations at study and outcome level (e.g., risk of bias), and at review level (e.g., incomplete retrieval of identified research, reporting bias). Comment on the validity of the assumptions, such as transitivity and consistency. Comment on any concerns regarding network geometry (e.g., avoidance of certain comparisons).                                                                                                          | Discussion<br>Limitations                                    |

|                |    |                                                                                                                                                                                                                                                                                                                                                                                                                                |            |
|----------------|----|--------------------------------------------------------------------------------------------------------------------------------------------------------------------------------------------------------------------------------------------------------------------------------------------------------------------------------------------------------------------------------------------------------------------------------|------------|
| Conclusions    | 26 | Provide a general interpretation of the results in the context of other evidence, and implications for future research.                                                                                                                                                                                                                                                                                                        | Conclusion |
| <b>Funding</b> |    |                                                                                                                                                                                                                                                                                                                                                                                                                                |            |
| Funding        | 27 | Describe sources of funding for the systematic review and other support (e.g., supply of data); role of funders for the systematic review. This should also include information regarding whether funding has been received from manufacturers of treatments in the network and/or whether some of the authors are content experts with professional conflicts of interest that could affect use of treatments in the network. | Funding    |

Table S2 - Keywords and search results in different databases1380

| Database         | Keyword                                                                                                    | Date       | Results |
|------------------|------------------------------------------------------------------------------------------------------------|------------|---------|
| PubMed           | ('music') AND ('cognitive') AND ('dementia' OR 'alzheimer') AND ('random' OR 'randomized' OR 'randomised') | 2024.01.15 | 163     |
| Embase           | ('music') AND ('cognitive') AND ('dementia' OR 'alzheimer') AND ('random' OR 'randomized' OR 'randomised') | 2024.01.15 | 238     |
| Cochrane CENTRAL | ('music') AND ('cognitive') AND ('dementia' OR 'alzheimer') AND ('random' OR 'randomized' OR 'randomised') | 2024.01.15 | 203     |
| Web of Science   | ('music') AND ('cognitive') AND ('dementia' OR 'alzheimer') AND ('random' OR 'randomized' OR 'randomised') | 2024.01.15 | 173     |

777

| Database         | Keyword                                                                                                   | Date       | Results |
|------------------|-----------------------------------------------------------------------------------------------------------|------------|---------|
| PubMed           | ('sing') AND ('cognitive') AND ('dementia' OR 'alzheimer') AND ('random' OR 'randomized' OR 'randomised') | 2024.01.15 | 24      |
| Embase           | ('sing') AND ('cognitive') AND ('dementia' OR 'alzheimer') AND ('random' OR 'randomized' OR 'randomised') | 2024.01.15 | 5       |
| Cochrane CENTRAL | ('sing') AND ('cognitive') AND ('dementia' OR 'alzheimer') AND ('random' OR 'randomized' OR 'randomised') | 2024.01.15 | 40      |
| Web of Science   | ('sing') AND ('cognitive') AND ('dementia' OR 'alzheimer') AND ('random' OR 'randomized' OR 'randomised') | 2024.01.15 | 23      |

92

| Database | Keyword | Date | Results |
|----------|---------|------|---------|
|----------|---------|------|---------|

|                     |                                                                                                             |            |     |
|---------------------|-------------------------------------------------------------------------------------------------------------|------------|-----|
| PubMed              | ('rhythm') AND ('cognitive') AND ('dementia' OR 'alzheimer') AND ('random' OR 'randomized' OR 'randomised') | 2024.01.15 | 97  |
| Embase              | ('rhythm') AND ('cognitive') AND ('dementia' OR 'alzheimer') AND ('random' OR 'randomized' OR 'randomised') | 2024.01.15 | 203 |
| Cochrane<br>CENTRAL | ('rhythm') AND ('cognitive') AND ('dementia' OR 'alzheimer') AND ('random' OR 'randomized' OR 'randomised') | 2024.01.15 | 115 |
| Web of Science      | ('rhythm') AND ('cognitive') AND ('dementia' OR 'alzheimer') AND ('random' OR 'randomized' OR 'randomised') | 2024.01.15 | 96  |
|                     |                                                                                                             |            | 511 |

**Table S3: Studies excluded from the analysis along with the reasons for their exclusion.**

| No. | First Author / Year        | Title                                                                                                                                                                | Journal/Book                                                | Exclusion reasons        |
|-----|----------------------------|----------------------------------------------------------------------------------------------------------------------------------------------------------------------|-------------------------------------------------------------|--------------------------|
| 1   | Bakerjian et al., 2020     | The Impact of Music and Memory on Resident Level Outcomes in California Nursing Homes                                                                                | Journal of the American Medical Directors Association       | Not RCT                  |
| 2   | Buard et al., 2021         | Randomized controlled trial of neurologic music therapy in Parkinson's disease: research rehabilitation protocols for mechanistic and clinical investigations        | Trials                                                      | Protocol                 |
| 3   | Cheung et al., 2018        | The effects of the music-with-movement intervention on the cognitive functions of people with moderate dementia: a randomized controlled trial                       | Aging Ment Health                                           | Incomplete data          |
| 4   | Cheung et al., 2022        | A home-based dyadic music-with-movement intervention for people with dementia and caregivers: A hybrid type 2 cluster-randomized effectiveness-implementation design | Clinical Interventions in Aging                             | No relevant outcome data |
| 5   | Clark et al., 2020         | "It's Feasible to Write a Song": A Feasibility Study Examining Group Therapeutic Songwriting for People Living With Dementia and Their Family Caregivers             | Frontiers in Psychology                                     | Incomplete data          |
| 6   | Cooke et al. 2010          | A randomized controlled trial exploring the effect of music on agitated behaviours and anxiety in older people with dementia                                         | Aging & Mental Health                                       | Incomplete data          |
| 7   | Davison et al., 2016       | A personalized multimedia device to treat agitated behavior and improve mood in people with dementia: A pilot study                                                  | Geriatr Nursing                                             | Pilot study              |
| 8   | Delphin-Combe et al., 2013 | Effect of a non-pharmacological intervention, Voix d'Or(®), on behavior disturbances in Alzheimer disease and associated disorders                                   | Gériatrie et Psychologie Neuropsychiatrie du Vieillissement | No relevant outcome data |
| 9   | Dimitriou et al., 2020     | Non-Pharmacological interventions for the anxiety in patients with dementia. A cross-over randomised controlled trial                                                | Behavioural Brain Research                                  | No relevant outcome data |
| 10  | Feng et al., 2020          | Effects of choral singing versus health education on cognitive decline and aging: a randomized controlled trial                                                      | Aging-US: Peer-Reviewed Aging Research Journal              | Incomplete data          |



|    |                         |                                                                                                                                                                                                              |                                                       |                          |
|----|-------------------------|--------------------------------------------------------------------------------------------------------------------------------------------------------------------------------------------------------------|-------------------------------------------------------|--------------------------|
| 11 | Gaviola et al., 2020    | Impact of individualised music listening intervention on persons with dementia: A systematic review of randomised controlled trials                                                                          | Australasian journal on ageing                        | Review & meta analysis   |
| 12 | Giovagnoli et al., 2017 | Cognitive training in Alzheimer's disease: a controlled randomized study                                                                                                                                     | Neurological Sciences                                 | No relevant outcome data |
| 13 | Guétin et al., 2009     | Effect of music therapy on anxiety and depression in patients with Alzheimer's type dementia: randomised, controlled study                                                                                   | Dementia and Geriatric Cognitive Disorders            | No relevant outcome data |
| 14 | Jung et al., 2023       | Effect of internet-based vs. in-person multimodal interventions on patients with mild to moderate Alzheimer's disease: a randomized, cross-over, open-label trial                                            | Frontiers in Public Health                            | No music intervention    |
| 15 | Kwak et al., 2020       | Findings From a Prospective Randomized Controlled Trial of an Individualized Music Listening Program for Persons With Dementia                                                                               | Journal of Applied Gerontology                        | Incomplete data          |
| 16 | Lai et al., 2016        | Interdisciplinary collaboration in the use of a music-with-movement intervention to promote the wellbeing of people with dementia and their families: Development of an evidence-based intervention protocol | Nursing & Health Sciences                             | Protocol                 |
| 17 | Liu et al., 2021        | Group Music Intervention Using Percussion Instruments to Reduce Anxiety Among Elderly Male Veterans with Alzheimer Disease                                                                                   | Medical Science Monitor                               | No relevant outcome data |
| 18 | Loi et al., 2022        | Music and Psychology & Social Connections Program: Protocol for a Novel Intervention for Dyads Affected by Younger-Onset Dementia                                                                            | Brain Sciences                                        | Protocol                 |
| 19 | Mahendran et al., 2017  | Art therapy and music reminiscence activity in the prevention of cognitive decline: Study protocol for a randomized controlled trial                                                                         | Trials                                                | Protocol                 |
| 20 | McCreedy et al., 2022   | Pragmatic Trial of Personalized Music for Agitation and Antipsychotic Use in Nursing Home Residents With Dementia                                                                                            | Journal of the American Medical Directors Association | Incomplete data          |
| 21 | McCreedy et al., 2022   | Is there a role for music therapy in the recovery approach in mental health?                                                                                                                                 | The Arts in Psychotherapy                             | No relevant outcome data |
| 22 | Moreira et al., 2023    | Music Therapy Enhances Episodic Memory in Alzheimer's and Mixed Dementia: A Double-Blind Randomized Controlled Trial                                                                                         | Healthcare                                            | No relevant outcome data |

|    |                      |                                                                                                                                                                                         |                                                    |                          |
|----|----------------------|-----------------------------------------------------------------------------------------------------------------------------------------------------------------------------------------|----------------------------------------------------|--------------------------|
| 23 | Na et al., 2019      | A systematic review and meta-analysis of nonpharmacological interventions for moderate to severe dementia                                                                               | Psychiatry Investigation                           | Review & meta analysis   |
| 24 | Noone et al., 2019   | Meta-analysis of psychosocial interventions for people with dementia and anxiety or depression                                                                                          | Aging & mental health                              | Review & meta analysis   |
| 25 | Pongan et al., 2017  | Can Musical or Painting Interventions Improve Chronic Pain, Mood, Quality of Life, and Cognition in Patients with Mild Alzheimer's Disease? Evidence from a Randomized Controlled Trial | Journal of Alzheimer's Disease                     | No relevant outcome data |
| 26 | Raglio et al., 2008  | Efficacy of music therapy in the treatment of behavioral and psychiatric symptoms of dementia                                                                                           | Alzheimer Disease & Associated Disorders           | Incomplete data          |
| 27 | Raglio et al., 2008  | Efficacy of music therapy in the treatment of behavioral and psychiatric symptoms of dementia                                                                                           | Alzheimer Dis Assoc Disord                         | No relevant outcome data |
| 28 | Raglio et al., 2015  | Effect of Active Music Therapy and Individualized Listening to Music on Dementia: A Multicenter Randomized Controlled Trial                                                             | Journal of the American Geriatrics Society         | No relevant outcome data |
| 29 | Raglio et al., 2015  | Effects of music and music therapy on mood in neurological patients                                                                                                                     | World Journal of Psychiatry                        | Review & meta analysis   |
| 30 | Ridder et al., 2002  | Individual music therapy for agitation in dementia: an exploratory randomized controlled trial                                                                                          | Aging & Mental Health                              | No relevant outcome data |
| 31 | Sánchez et al., 2016 | Comparing the Effects of Multisensory Stimulation and Individualized Music Sessions on Elderly People with Severe Dementia: A Randomized Controlled Trial                               | Journal of Alzheimer's Disease                     | Incomplete data          |
| 32 | Sánchez et al., 2016 | Comparing the Effects of Multisensory Stimulation and Individualized Music Sessions on Elderly People with Severe Dementia: A Randomized Controlled Trial                               | Journal of Alzheimer's Disease                     | No relevant outcome data |
| 33 | Särkämö et al., 2014 | Music perception and cognition: development, neural basis, and rehabilitative use of music                                                                                              | Wiley Interdisciplinary Reviews: Cognitive Science | Incomplete data          |

|    |                           |                                                                                                                                                              |                                                                |                          |
|----|---------------------------|--------------------------------------------------------------------------------------------------------------------------------------------------------------|----------------------------------------------------------------|--------------------------|
| 34 | Särkämö et al., 2014      | Cognitive, Emotional, and Social Benefits of Regular Musical Activities in Early Dementia: Randomized Controlled Study                                       | The Gerontologist                                              | Incomplete data          |
| 35 | Scott S. et al., 2016     | A scoping review of music and anxiety, depression and agitation in older people with dementia in residential facilities and specialist care units            | European Geriatric Medicine                                    | Review & meta analysis   |
| 36 | Sung et al., 2010         | A preferred music listening intervention to reduce anxiety in older adults with dementia in nursing homes                                                    | Journal of clinical nursing                                    | No relevant outcome data |
| 37 | Sung et al., 2012         | A group music intervention using percussion instruments with familiar music to reduce anxiety and agitation of institutionalized older adults with dementia  | International Journal of Geriatric Psychiatry                  | No relevant outcome data |
| 38 | Svansdottir et al., 2006  | Music therapy in moderate and severe dementia of Alzheimer's type: a case-control study                                                                      | International Psychogeriatrics                                 | Incomplete data          |
| 39 | Tan et al., 2018          | Study protocol for a randomized controlled trial of choral singing intervention to prevent cognitive decline in at-risk older adults living in the community | Frontiers in Aging Neuroscience                                | Protocol                 |
| 40 | Tang et al., 2013         | The effectiveness of nursing management on improving health outcomes for hospitalized older adults with delirium: A systematic review protocol               | JBIC Database of Systematic Reviews and Implementation Reports | Protocol                 |
| 41 | Thornley et al., 2016     | Music therapy in patients with dementia and behavioral disturbance on an inpatient psychiatry unit: results from a pilot randomized controlled study         | International Psychogeriatrics                                 | Pilot study              |
| 42 | Valdiglesias et al., 2017 | Is Salivary Chromogranin A a Valid Psychological Stress Biomarker During Sensory Stimulation in People with Advanced Dementia?                               | Journal of Alzheimer's Disease                                 | Incomplete data          |
| 43 | Vink et al., 2012         | Effectiveness of group music intervention against agitated behavior in elderly persons with dementia                                                         | International Journal of Geriatric Psychiatry                  | No relevant outcome data |
| 44 | Zhang et al., 2023        | Does music intervention relieve depression or anxiety in people living with dementia? A systematic review and meta-analysis                                  | Aging & Mental Health                                          | Review & meta analysis   |

**Table S4 - Detailed quality assessment of included studies using  
Cochrane risk of bias 2 tool**

| First author & Year         | Randomization<br>process | Intervention<br>adherence | Missing<br>outcome<br>data | Outcome<br>measurement | Selective<br>reporting | Overall<br>RoB |
|-----------------------------|--------------------------|---------------------------|----------------------------|------------------------|------------------------|----------------|
| Biasutti et al., 2018       | S                        | S3                        | S                          | S                      | L                      | S              |
| Biasutti et al., 2021       | L                        | S2                        | S                          | L                      | S                      | S              |
| Ceccato et al., 2012        | L                        | S3                        | L                          | L                      | S                      | S              |
| Cheung et al., 2018         | L                        | L2                        | L                          | L                      | S                      | L              |
| Chu et al., 2013            | L                        | L2                        | S                          | L                      | L                      | S              |
| Giovagnoli et al., 2017     | L                        | S2                        | S                          | L                      | L                      | L              |
| Giovagnoli et al., 2018     | L                        | S2                        | S                          | L                      | S                      | S              |
| Lyu et al., 2018            | L                        | S2                        | L                          | L                      | L                      | S              |
| Pérez-Ros et al., 2019      | S                        | S2                        | S                          | L                      | S                      | S              |
| Pongan et al., 2017         | L                        | S3                        | S                          | S                      | S                      | S              |
| Prinz et al., 2023          | S                        | S3                        | L                          | S                      | L                      | S              |
| Tang et al., 2018           | L                        | L2                        | L                          | L                      | L                      | L              |
| van de Winckel et al., 2004 | S                        | S2                        | S                          | S                      | S                      | S              |
| Wang et al., 2018           | L                        | S3                        | S                          | L                      | S                      | S              |

- 1 The study employed a waitlist control group design, which resulted in a more balanced comparison among different groups.
- 2 The differences in protocols among various groups may affect adherence and outcome.
- 3 Both groups were randomized to receive exercise interventions, and the study design utilized a balanced protocol, which minimized the impact on adherence.

H, high risk of bias; L, low risk of bias; S, some risk of bias.

**Table S5. Inconsistency test outcomes for the standardized mean difference in enhancing cognitive function in patients with dementia treated of music therapy**

| Comparison       | Studies | NMA   | Direct | Indirect | Difference | 95CI_L | 95CI_U | p-Value |
|------------------|---------|-------|--------|----------|------------|--------|--------|---------|
| AMT:AMT+Sing     | 0.00    | -0.21 | -      | -0.21    | -          | -      | -      | -       |
| AMT:Control      | 5.00    | 0.57  | 0.57   | -        | -          | -      | -      | -       |
| AMT:LtM          | 0.00    | 0.23  | -      | 0.23     | -          | -      | -      | -       |
| AMT:RMT          | 0.00    | -0.19 | -      | -0.19    | -          | -      | -      | -       |
| AMT:Sing         | 0.00    | 0.31  | -      | 0.31     | -          | -      | -      | -       |
| AMT+Sing:Control | 1.00    | 0.79  | 0.79   | -        | -          | -      | -      | -       |
| AMT+Sing:LtM     | 0.00    | 0.44  | -      | 0.44     | -          | -      | -      | -       |
| AMT+Sing:RMT     | 0.00    | 0.02  | -      | 0.02     | -          | -      | -      | -       |
| AMT+Sing:Sing    | 0.00    | 0.52  | -      | 0.52     | -          | -      | -      | -       |
| LtM:Control      | 3.00    | 0.35  | 0.32   | 0.73     | -0.41      | -2.17  | 1.35   | 0.65    |
| RMT:Control      | 3.00    | 0.76  | 0.76   | 0.77     | -0.01      | -1.60  | 1.59   | 0.99    |
| Sing:Control     | 3.00    | 0.27  | 0.27   | -        | -          | -      | -      | -       |
| LtM:RMT          | 1.00    | -0.42 | -0.36  | -0.50    | 0.14       | -0.91  | 1.19   | 0.79    |
| LtM:Sing         | 0.00    | 0.08  | -      | 0.08     | -          | -      | -      | -       |
| RMT:Sing         | 0.00    | 0.50  | -      | 0.50     | -          | -      | -      | -       |

95CI-L: lower limit of 95% confidence interval; 95CI-U: upper limit of 95% confidence interval; NMA: network meta-analysis.

**Table S6.** Inconsistency test results for the risk difference in dropout rates when applying music therapy to alleviate cognitive function in patients with dementia.

| Comparison       | Studies | NMA   | Direct | Indirect | Difference | 95CI-L | 95CI-U | p-value |
|------------------|---------|-------|--------|----------|------------|--------|--------|---------|
| AMT:AMT+Sing     | 0       | -0.03 | -      | -0.03    | -          | -      | -      | -       |
| AMT:Control      | 5       | 0.01  | 0.01   | -        | -          | -      | -      | -       |
| AMT:LtM          | 0       | 0.01  | -      | 0.01     | -          | -      | -      | -       |
| AMT:RMT          | 0       | 0.02  | -      | 0.02     | -          | -      | -      | -       |
| AMT:Sing         | 0       | 0.02  | -      | 0.02     | -          | -      | -      | -       |
| AMT+Sing:Control | 1       | 0.04  | 0.04   | -        | -          | -      | -      | -       |
| AMT+Sing:LtM     | 0       | 0.04  | -      | 0.04     | -          | -      | -      | -       |
| AMT+Sing:RMT     | 0       | 0.05  | -      | 0.05     | -          | -      | -      | -       |
| AMT+Sing:Sing    | 0       | 0.05  | -      | 0.05     | -          | -      | -      | -       |
| LtM:Control      | 3       | 0.00  | 0.00   | -0.21    | 0.21       | -0.10  | 0.53   | 0.19    |
| RMT:Control      | 3       | 0.00  | 0.00   | 0.00     | 0.00       | -0.09  | 0.08   | 0.91    |
| Sing:Control     | 3       | 0.00  | 0.00   | -        | -          | -      | -      | -       |
| LtM:RMT          | 1       | 0.00  | 0.00   | 0.02     | -0.02      | -0.10  | 0.06   | 0.67    |
| LtM:Sing         | 0       | 0.00  | -      | 0.00     | -          | -      | -      | -       |
| RMT:Sing         | 0       | 0.00  | -      | 0.00     | -          | -      | -      | -       |

95CI-L: lower limit of 95% confidence interval; 95CI-U: upper limit of 95% confidence interval; NMA: network meta-analysis.

**Figure S1: Summary of the quality assessment for included studies.**

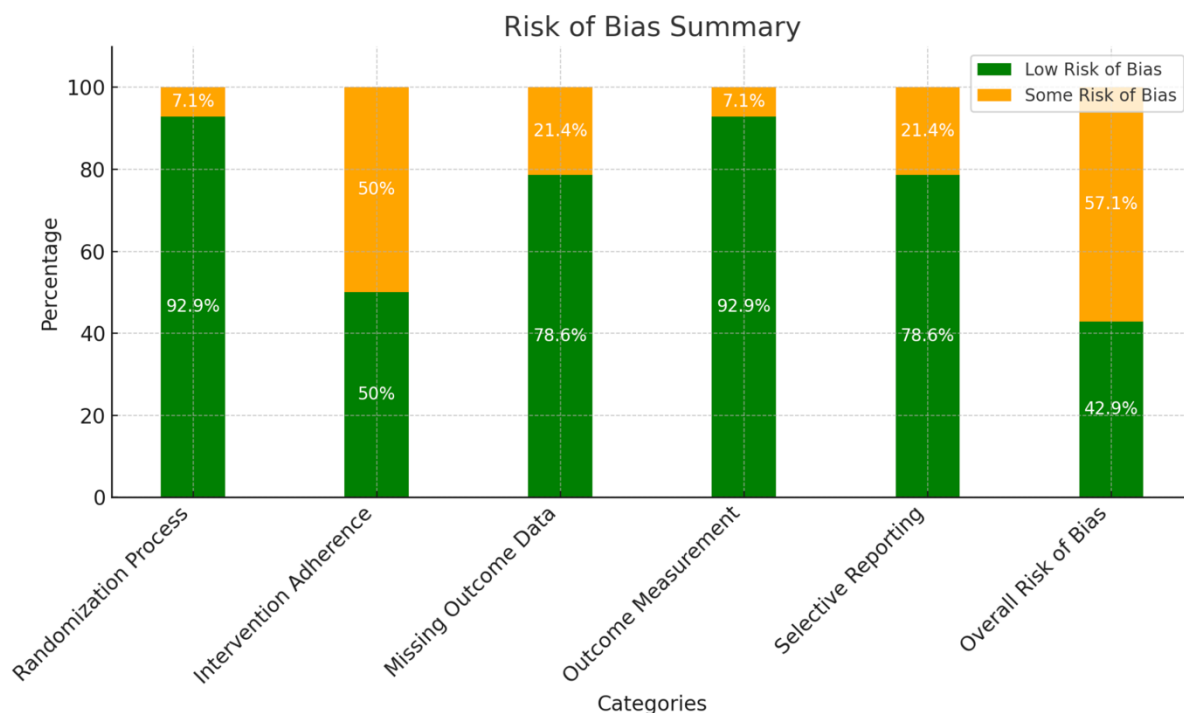

Figure S1 presents the risk of bias summary for the studies assessed in a meta-analysis. The categories evaluated include the randomization process, intervention adherence, missing outcome data, outcome measurement, selective reporting, and the overall risk of bias. The largest concerns appear in the categories of intervention adherence and overall risk of bias, where 50% of the studies exhibit some risk of bias. Notably, the outcome measurement category shows a high level of confidence, with 92.9% of studies classified as having a low risk of bias. This chart underscores the areas where the included studies have robust methodology and where potential biases might influence the validity of the findings.



Figure S2

Individual study results (with studies excluded) grouped by treatment comparison

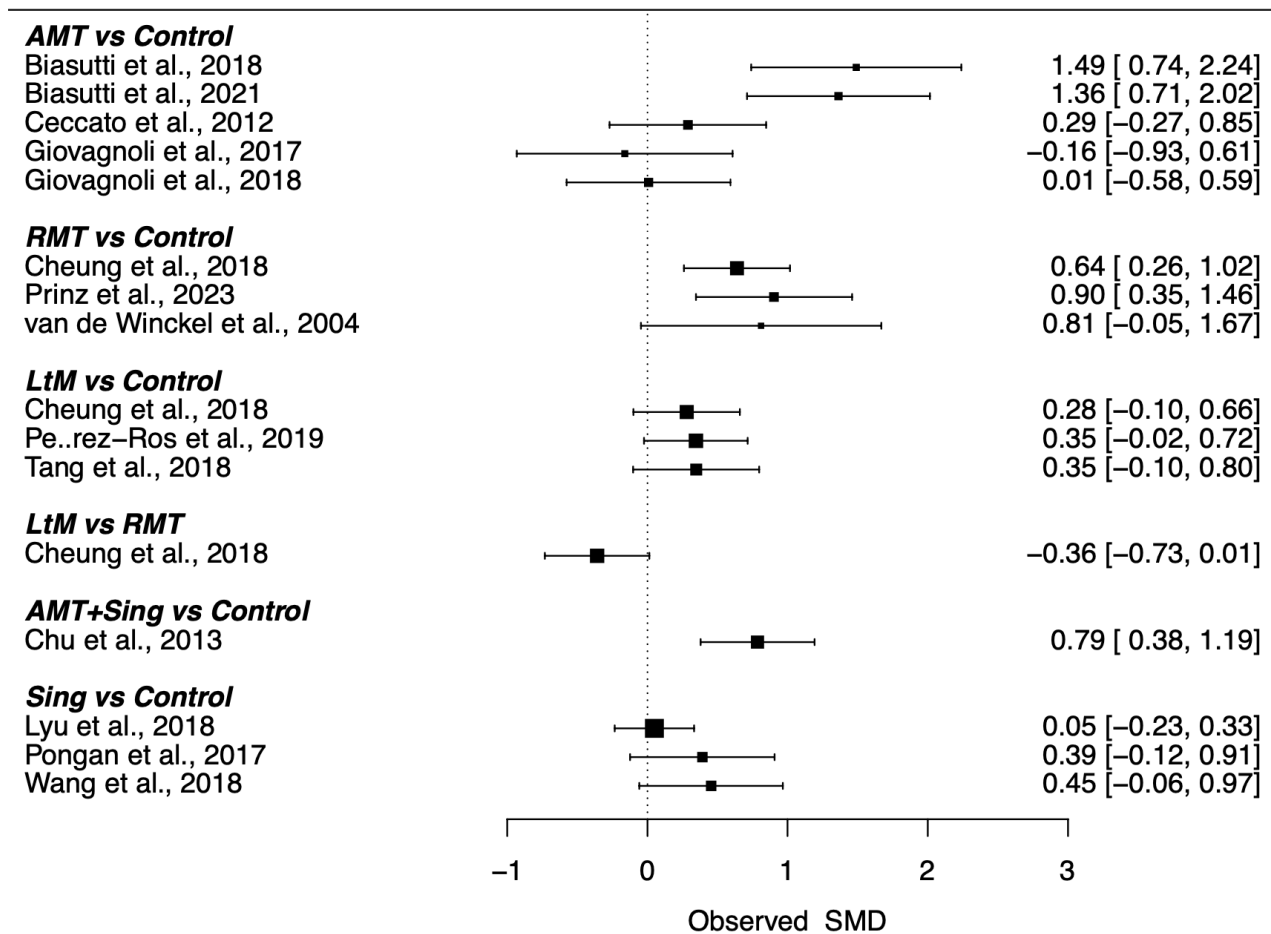

**Fig. S2** - The forest plot of pairwise comparisons for different music therapy interventions to improve cognitive function in dementia patients, retrieved from the included trials, demonstrates the standardized mean difference (SMD).

Figure S3

Individual study results (with studies excluded) grouped by treatment comparison.

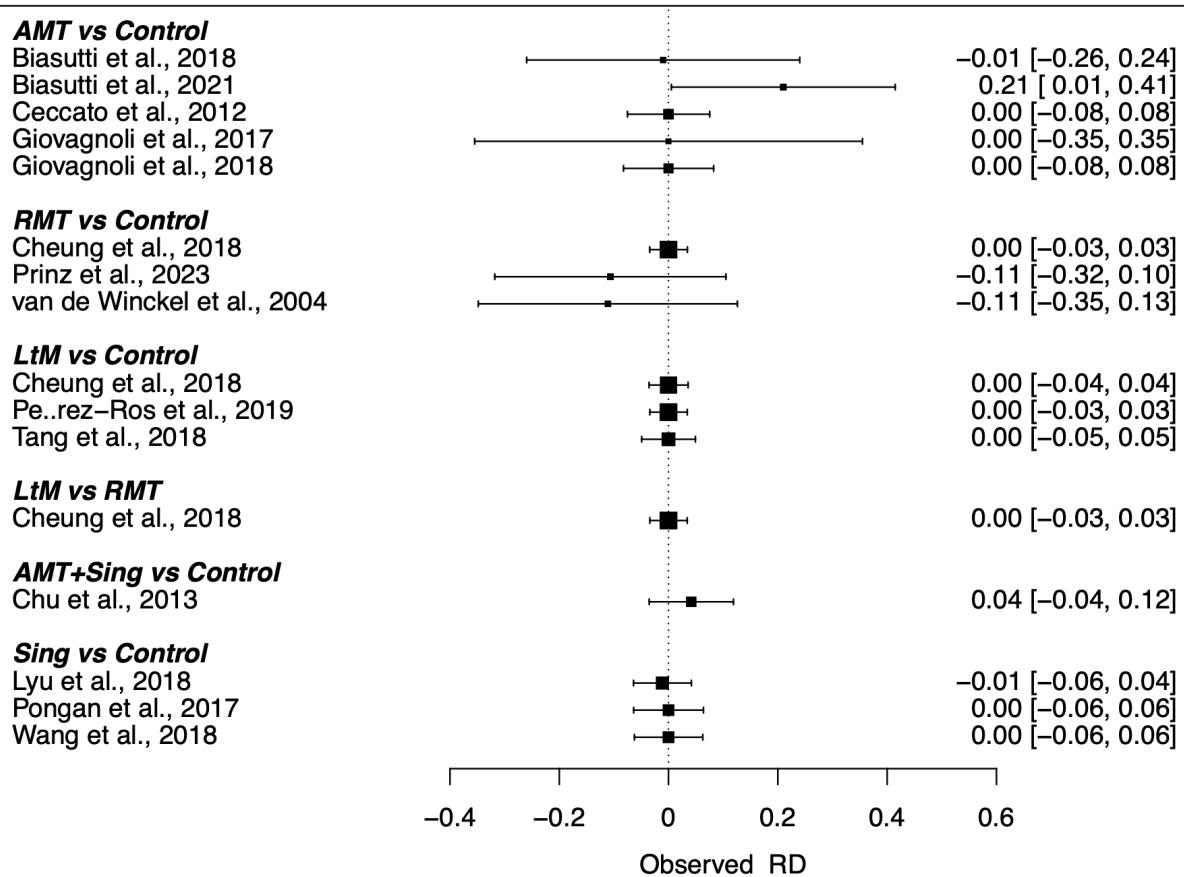

**Fig. S3** - The forest plot of pairwise comparisons for different music therapy interventions to enhance cognitive function in dementia patients, retrieved from the included trials, demonstrates the risk difference (RD) of dropout rates. None of the comparisons reached statistical significance.

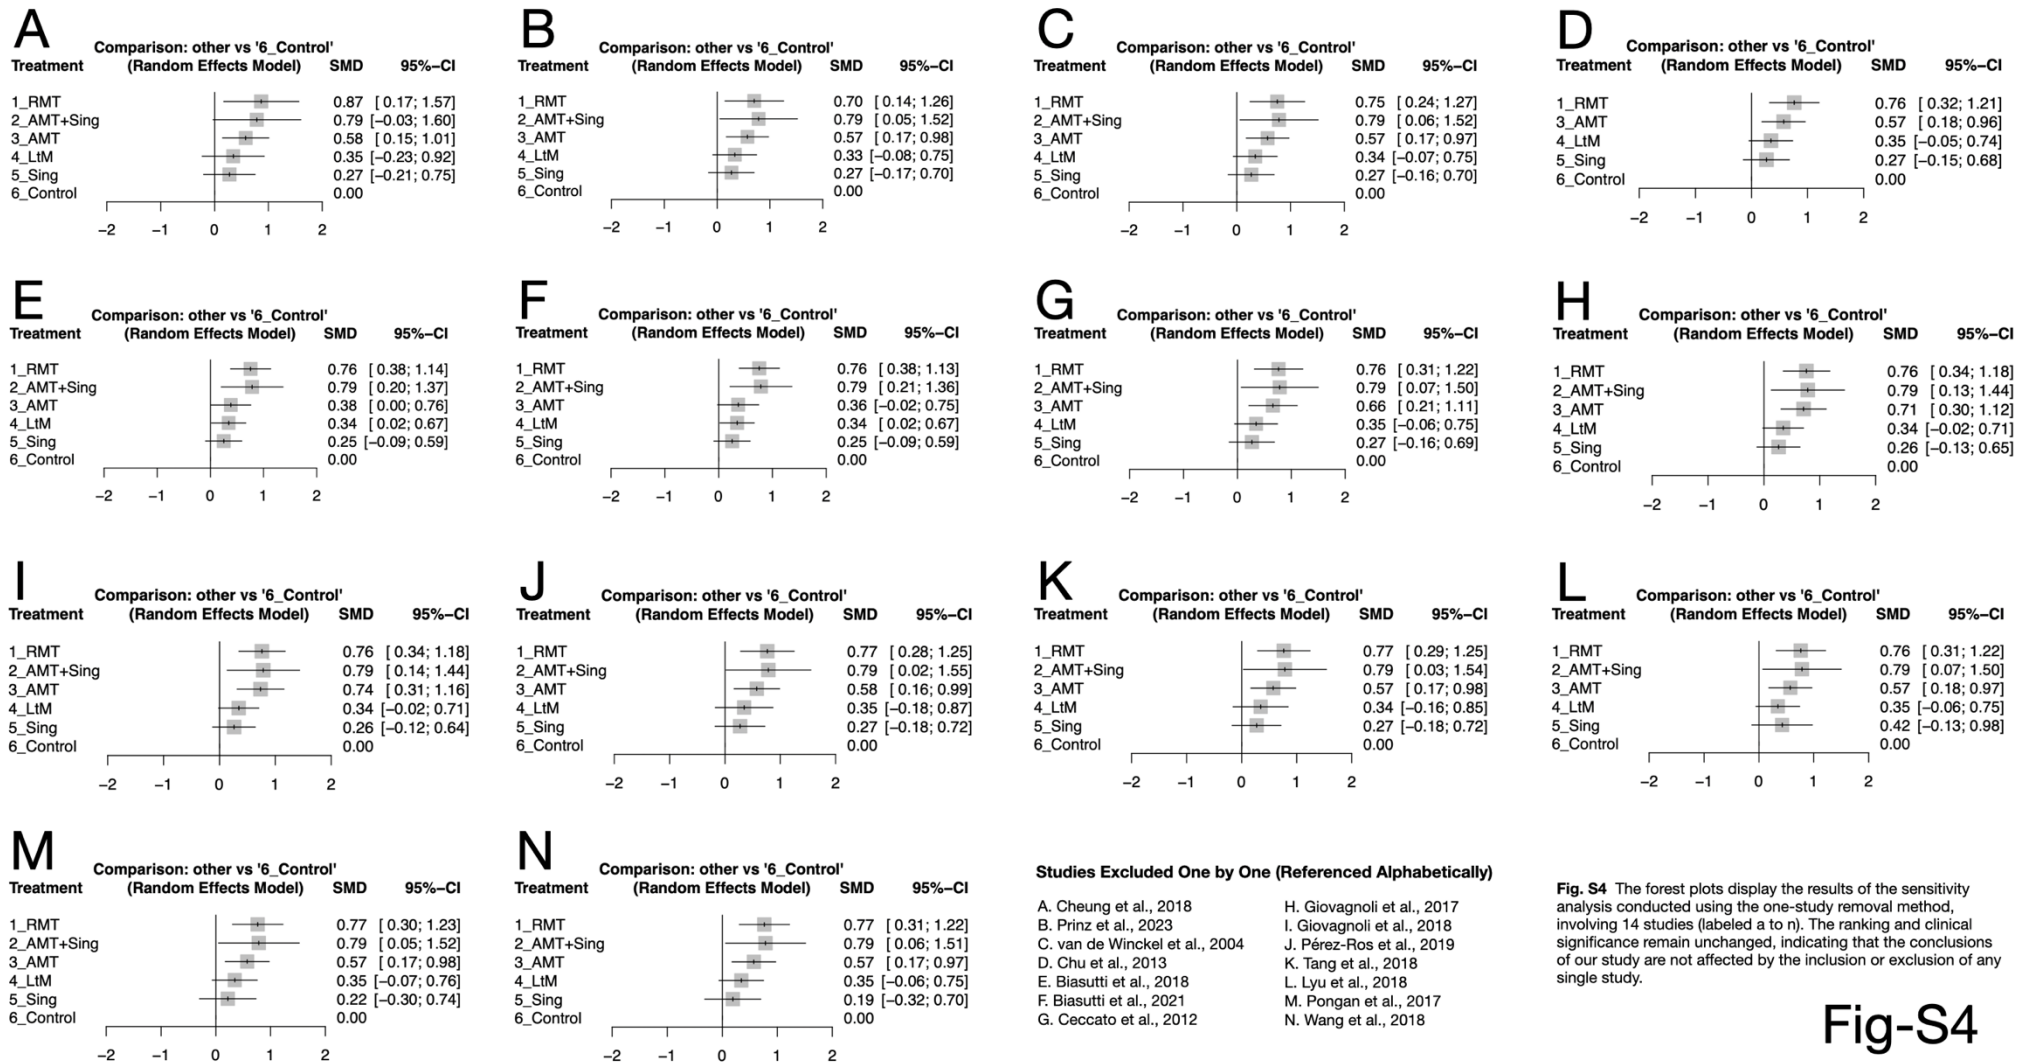

**Fig. S4** The forest plots display the results of the sensitivity analysis conducted using the one-study removal method, involving 14 studies (labeled a to n). The ranking and clinical significance remain unchanged, indicating that the conclusions of our study are not affected by the inclusion or exclusion of any single study.

**Fig-S4**

**Fig. S4** - The forest plots display the results of the sensitivity analysis conducted using the one-study removal method, involving 14 studies (labeled A to N). The ranking and clinical significance remain unchanged, indicating that the conclusions of our study are not affected by the inclusion or exclusion of any single study.

Figure S5

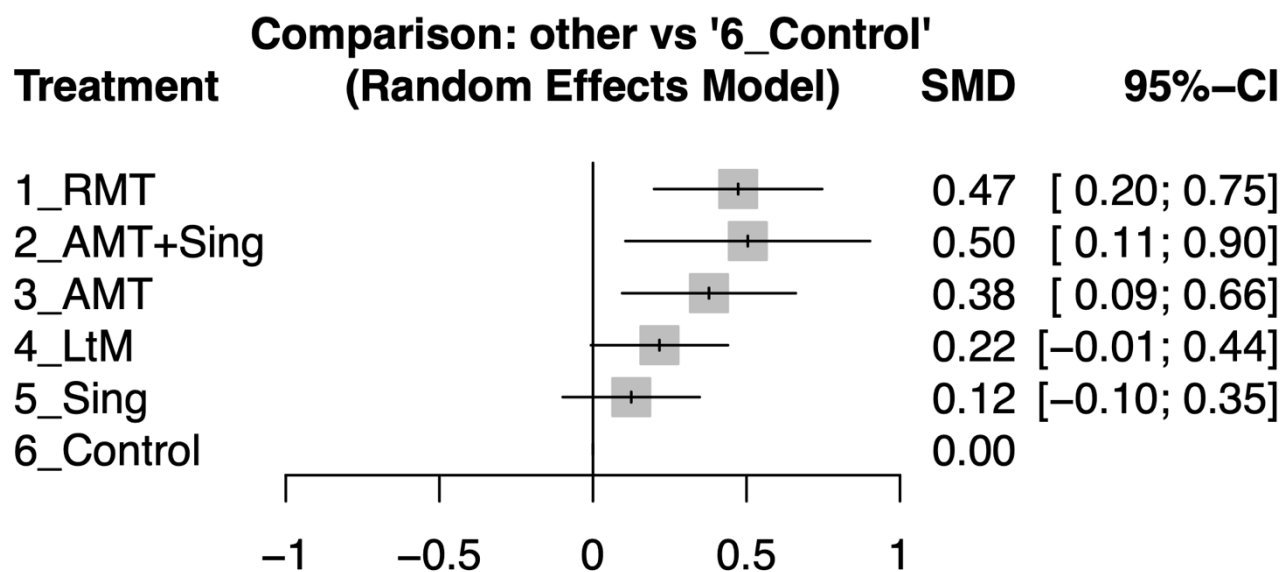

**Fig. S5** - Forest plot displaying the improvement in cognitive function in dementia patients after receiving different types of music therapy interventions, presented as standardized mean differences (SMDs). The pre-post correlation coefficient used in the calculation of data was changed from 0.8 used in Figure 3 to 0.5 in this figure as a sensitivity analysis. The ranking and clinical interpretations remained unchanged compared to Figure 3. This suggests that the conclusions of our study remain unchanged despite different assumptions regarding the coefficient used for transformation.

**Figure S6: Publication bias.**

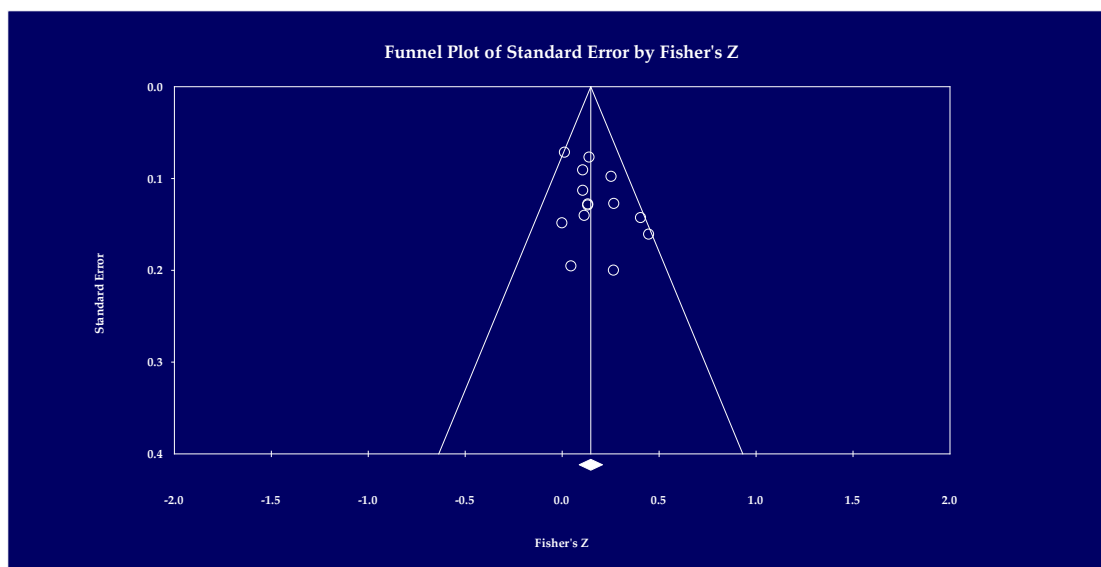

### **Egger's Test of the Intercept**

In this case the intercept ( $B_0$ ) is 1.46, 95% CI (-0.47 to 3.38), with  $t=1.66$ ,  $df=12$ . The 1-tailed p-value is 0.07, and the 2-tailed p-value is 0.13.
